# Supplementary material for: Deciphering Bartonella Diversity, Recombination, and Host Specificity in a Rodent Community
Source: PubMed Central journal article supplement (PMC3722228; doi:10.1371/journal.pone.0068956), 2013-07-24

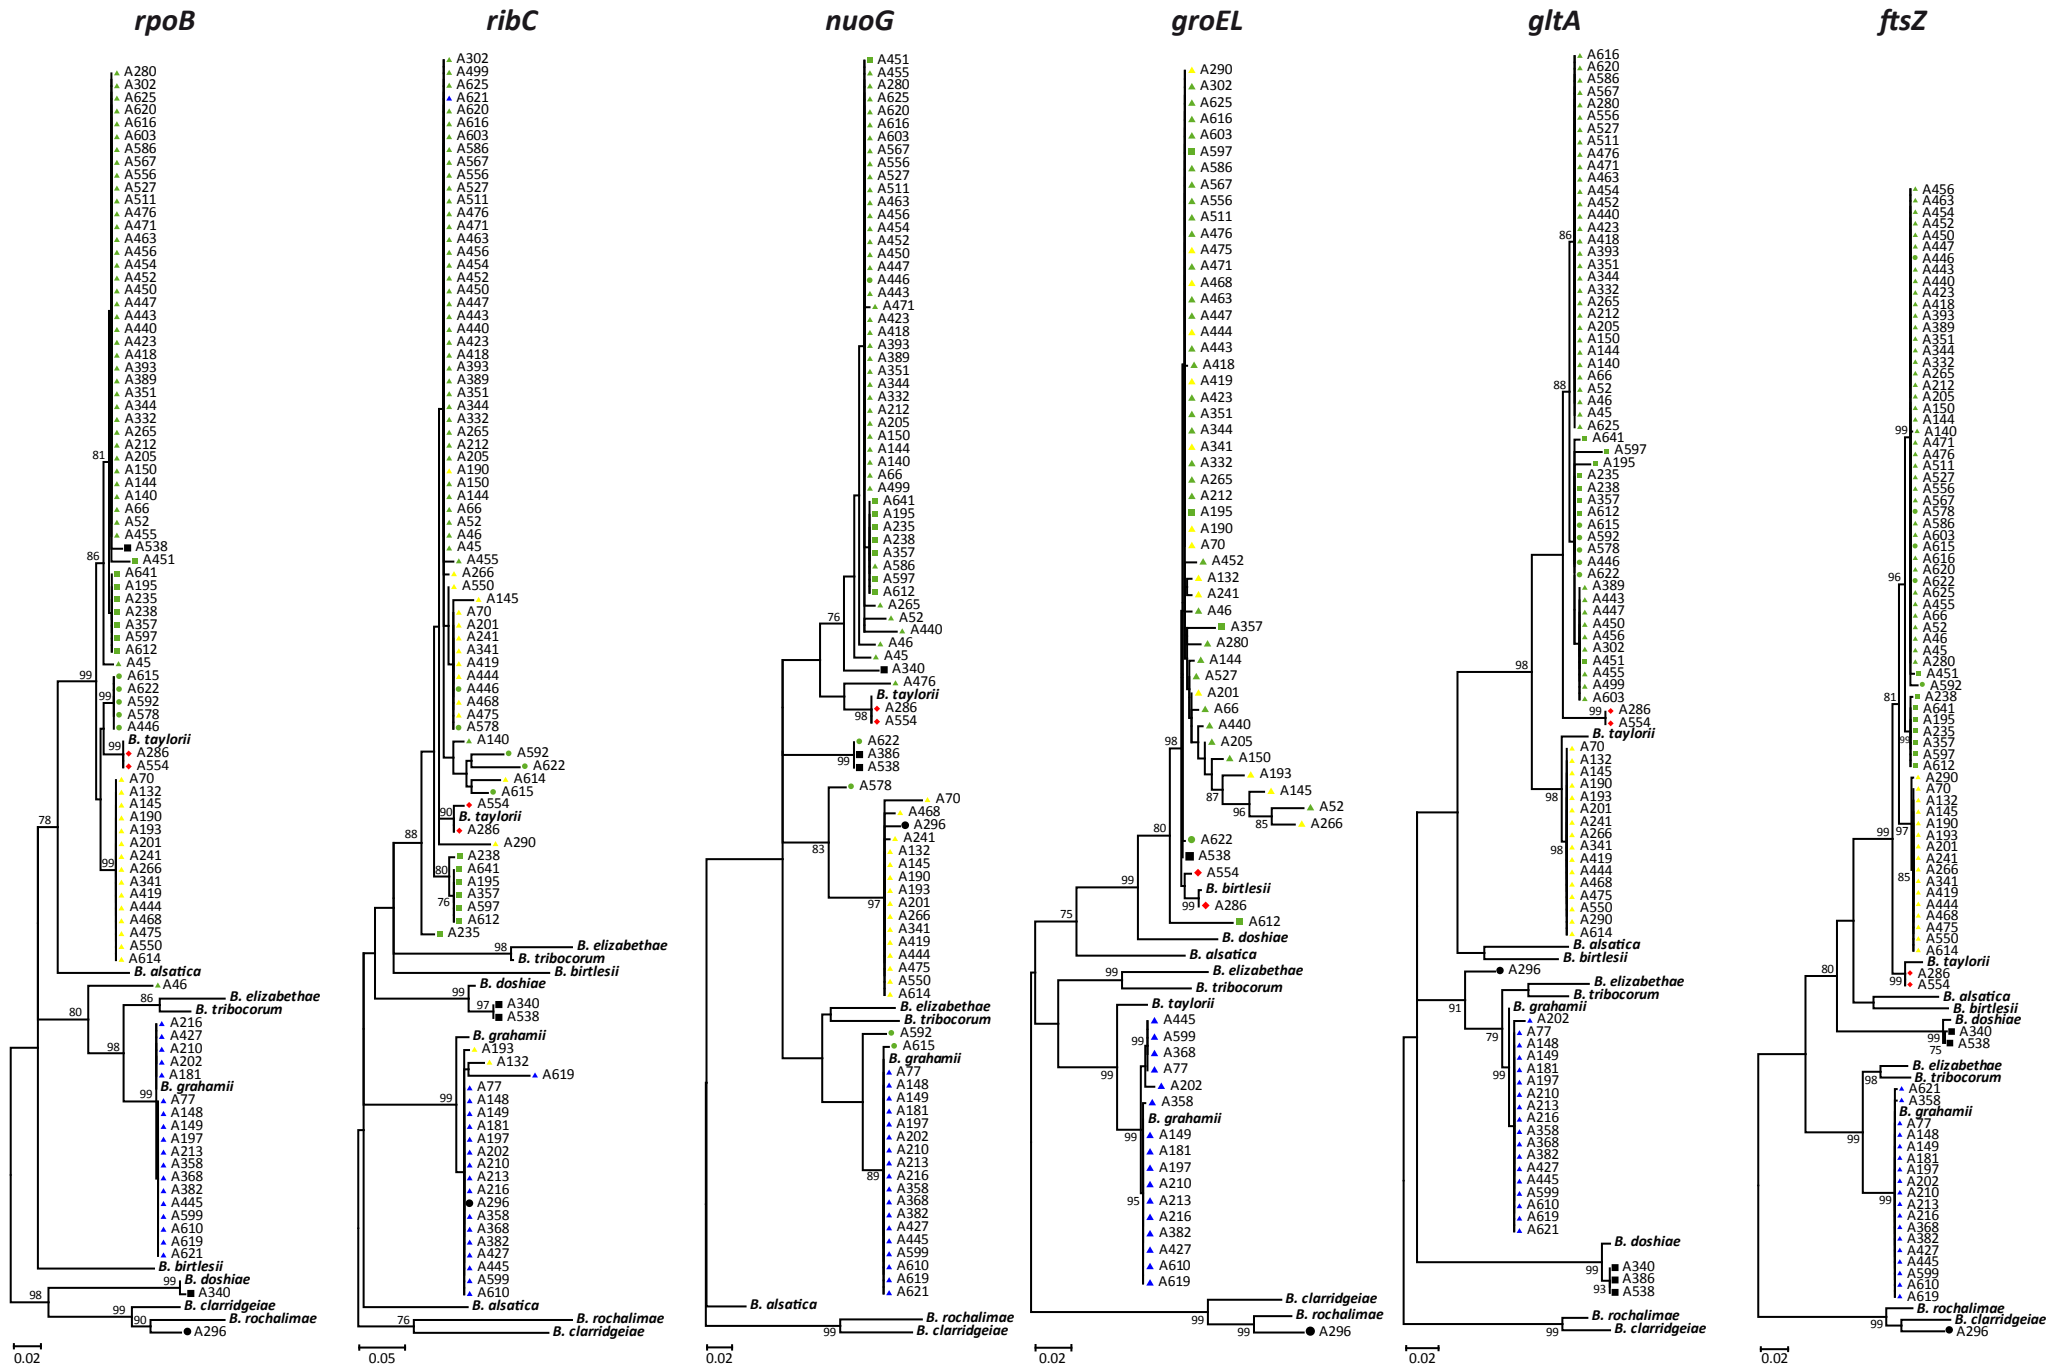

Supplement: pone.0068956.s001.pdf [file pone.0068956.s001.pdf]
